# Supplementary material for: Is High-Density Lipoprotein Cholesterol Causally Related to Kidney Function? Evidence From Genetic Epidemiological Studies
Source: PubMed Central journal article supplement (PMC5084637; doi:10.1161/atvbaha.116.308393), 2016-10-26
Supplement: atv-36-2252-s001.pdf [file atv-36-2252-s001.pdf]

## Global Lipids Genetics Consortium

GWAS: 70 SNPs genome-wide significantly associated with HDL-cholesterol

Lookup of 68 SNPs within the CKDGen Consortium

### Results of Single SNP Analysis:

- 21% reached p-value  $< 0.05$  (Binomial-test:  $p=5.8 \times 10^{-6}$ )
- 6 SNPs significantly associated after Bonferroni-correction ( $p < 7.35 \times 10^{-4}$ )

### Results of Mendelian Randomization Analysis:

- Main analysis shows no causal association
- Sensitivity analyses accounting for pleiotropy also show no causal association

### Interpretation:

- The observed association between HDL-cholesterol and eGFR is probably caused by mechanisms other than the mere HDL-cholesterol concentration
