# Supplementary material for: Is High-Density Lipoprotein Cholesterol Causally Related to Kidney Function? Evidence From Genetic Epidemiological Studies
Source: PubMed Central journal article supplement (PMC5084637; doi:10.1161/atvbaha.116.308393), 2016-10-26
Supplement: atv-36-2252-s002.pdf [file atv-36-2252-s002.pdf]

# Supplement Material to

## Is HDL-cholesterol causally related to kidney function? Evidence from genetic epidemiological studies

**Running title:** HDL-cholesterol genes and kidney function

Stefan Coassin\* <sup>1</sup>, Salome Friedel\* <sup>1</sup>, Anna Köttgen <sup>2</sup>,  
Claudia Lamina <sup>1</sup>, Florian Kronenberg <sup>1</sup>

\* These authors contributed equally

<sup>1</sup> Division of Genetic Epidemiology, Department of Medical Genetics, Molecular and Clinical Pharmacology, Medical University of Innsbruck, Innsbruck, Austria

<sup>2</sup> Division of Genetic Epidemiology, Institute for Medical Biometry and Statistics, Medical Center – University of Freiburg, Faculty of Medicine, University of Freiburg, Germany

## Supplementary Note I

Only *TRIB1*<sup>1-3</sup> has been studied with respect to kidney function. *TRIB1* expression has been shown to predict serum creatinine at follow-up in patients with proteinuric renal disease<sup>4</sup> and might also represent a biomarker for allograft rejection in kidney transplantation<sup>5</sup>. An interaction between ApoL1 effect and variants near *TRIB1* has been reported in APOL1-associated nephropathy<sup>6</sup>. The observation that both HDL-cholesterol efflux capacity<sup>7</sup> and *TRIB1* expression<sup>5</sup> are associated with allograft rejection and failure might indirectly link one of our top hits to HDL function, which is known to be also strongly modified in kidney disease<sup>8</sup>. *STARD3* overexpression increases lipidation of exogenous apoA-I<sup>9</sup>, but effects on kidney metabolism have not been reported. However, *FBXL20*, located about 400 kb upstream, has been implicated with kidney function by CKDGen Consortium GWAS<sup>10, 11</sup> and the regional plots in<sup>10</sup> show a modest correlation between *STARD3* and *FBXL20*. Conversely, *R3HDM2* and its neighboring gene *INHBC* have been associated with serum urate levels in previous studies<sup>12, 13</sup>. *INHBC* has been previously reported by the CKDGen Consortium<sup>10</sup>. Our SNP maps in the intergenic region between these two genes. No function or phenotype is known for *ARL15*, but it has been proposed to be structurally related to ADP-ribosylation factors and Ras-related GTP-binding proteins which play key roles in the regulation of intracellular vesicle trafficking<sup>14</sup>. Also *STARD3* has been recently linked to late-endosome trafficking<sup>15</sup>.

Generally, the assignment of a SNP association to any gene has to be treated with care. This applies especially for SNPs in intergenic regions without clear hints about the gene whose function is modified by the SNP.

## Supplementary Note II: Power calculations

Power calculations were performed using the online tool <https://sb452.shinyapps.io/power/>. The tool requires an estimate of the proportion of HDL variance explained by the SNPs, as well as the expected causal estimate, which one wants to detect with the given sample size based on change in one standard deviation (SD) of the outcome (eGFR) per one SD change in exposure (HDL-cholesterol). The summarized data obtained from the GLGC consortium provide beta estimates per change in SD of HDL-cholesterol, but the beta estimates from the CKDGen Consortium refer to change in one unit of log-transformed eGFR. Therefore, the causal effect estimates calculated with the Mendelian randomization approach using summarized data from both consortia is not usable for power calculations, and we instead used an observed effect of ~0.08 SD change in eGFR per 1 SD change of HDL-cholesterol based on data from population-based studies. Assuming a combined R<sup>2</sup> of 6.6% for all 68 SNPs (calculated based on reported beta estimates as described in the Methods section) and 6.2% for 57 SNPs (excluding pleiotropic SNPs), a sample size of ~133000 and a

significance level of 5%, we have 100% power to detect a causal effect of this size, if it is truly there. We have 80% power to detect a causal effect of 0.03, which is roughly one third of the observed effect. Of note, our calculated causal effects range between 0.0012 to 0.013 (depending on the methods) and cannot be compared to the effect assumed for the power analysis, since it is based on different units.

**Supplementary Table I:** Summary of the single SNP association results from published data for all SNPs

| SNP        | Nearest Gene <sup>+</sup> | chr | Position <sup>+</sup> | A1* | A2 | EAF <sup>5</sup> | Association results with HDL based on Willer et al. <sup>16</sup> |        |           | Association results with eGFR based on Pattaro et al. <sup>11</sup> |        |          |
|------------|---------------------------|-----|-----------------------|-----|----|------------------|-------------------------------------------------------------------|--------|-----------|---------------------------------------------------------------------|--------|----------|
|            |                           |     |                       |     |    |                  | $\beta^{\#}$                                                      | se     | p         | $\beta^{\#\#}$                                                      | se     | p        |
| rs3764261  | CETP                      | 16  | 56993324              | a   | c  | 0.2942           | 0.2412                                                            | 0.0039 | 1.00E-769 | 0.0013                                                              | 0.0010 | 0.2      |
| rs1532085  | LIPC                      | 15  | 58683366              | a   | g  | 0.3668           | 0.1068                                                            | 0.0035 | 1.24E-188 | -0.0006                                                             | 0.0009 | 0.5      |
| rs12678919 | LPL                       | 8   | 19844222              | g   | a  | 0.1214           | 0.1554                                                            | 0.0057 | 1.38E-149 | 0.0002                                                              | 0.0014 | 0.91     |
| rs1883025  | ABCA1                     | 9   | 107664301             | c   | t  | 0.7573           | 0.0698                                                            | 0.0041 | 1.50E-65  | -0.0003                                                             | 0.0010 | 0.8      |
| rs16942887 | PSKH1                     | 16  | 67928042              | a   | g  | 0.1332           | 0.0831                                                            | 0.0051 | 8.28E-54  | -0.0002                                                             | 0.0013 | 0.87     |
| rs964184   | ZNF259                    | 11  | 116648917             | c   | g  | 0.8380           | 0.1065                                                            | 0.0071 | 6.09E-48  | 0.0015                                                              | 0.0013 | 0.25     |
| rs7241918  | LIPG                      | 18  | 47160953              | t   | g  | 0.8232           | 0.0902                                                            | 0.0064 | 1.11E-44  | 0.0005                                                              | 0.0012 | 0.69     |
| rs9987289  | PPP1R3B                   | 8   | 9183358               | g   | a  | 0.9248           | 0.0817                                                            | 0.0062 | 1.95E-41  | 0.0029                                                              | 0.0016 | 0.069    |
| rs4846914  | GALNT2                    | 1   | 230295691             | a   | g  | 0.5844           | 0.0479                                                            | 0.0034 | 3.51E-41  | 0.0000                                                              | 0.0009 | 0.99     |
| rs6065906  | PCIF1                     | 20  | 44554015              | t   | c  | 0.8021           | 0.0594                                                            | 0.0044 | 5.34E-40  | -0.0014                                                             | 0.0011 | 0.22     |
| rs838880   | SCARB1                    | 12  | 125261593             | c   | t  | 0.3259           | 0.0484                                                            | 0.0039 | 6.38E-32  | 0.0007                                                              | 0.0009 | 0.5      |
| rs2954029  | TRIB1                     | 8   | 126490972             | t   | a  | 0.4683           | 0.0401                                                            | 0.0034 | 2.67E-29  | -0.0041                                                             | 0.0009 | 3.30E-06 |
| rs3136441  | F2                        | 11  | 46743247              | c   | t  | 0.1372           | 0.0545                                                            | 0.0047 | 6.76E-29  | 0.0007                                                              | 0.0013 | 0.6      |
| rs174546   | FADS1                     | 11  | 61569830              | c   | t  | 0.6425           | 0.0391                                                            | 0.0035 | 8.30E-28  | 0.0010                                                              | 0.0009 | 0.28     |
| rs386000   | LILRA3                    | 19  | 54792761              | c   | g  | 0.1992           | 0.0479                                                            | 0.0047 | 2.71E-23  | 0.0003                                                              | 0.0012 | 0.78     |
| rs4420638  | APOC1                     | 19  | 45422946              | a   | g  | 0.8140           | 0.0669                                                            | 0.0068 | 1.72E-21  | -0.0017                                                             | 0.0015 | 0.27     |
| rs1689800  | ZNF648                    | 1   | 182168885             | a   | g  | 0.6728           | 0.0344                                                            | 0.0036 | 4.77E-20  | -0.0004                                                             | 0.0009 | 0.63     |
| rs581080   | TTC39B                    | 9   | 15305378              | c   | g  | 0.8206           | 0.0419                                                            | 0.0045 | 1.04E-19  | 0.0020                                                              | 0.0011 | 0.082    |
| rs2925979  | GAN                       | 16  | 81534790              | c   | t  | 0.7045           | 0.0351                                                            | 0.0037 | 1.32E-19  | 0.0015                                                              | 0.0009 | 0.12     |
| rs4660293  | PABPC4                    | 1   | 40028180              | a   | g  | 0.7639           | 0.0353                                                            | 0.0040 | 2.86E-18  | 0.0018                                                              | 0.0010 | 0.084    |
| rs181362   | RIMBP3C                   | 22  | 21932068              | c   | t  | 0.8008           | 0.0379                                                            | 0.0042 | 4.30E-18  | -0.0011                                                             | 0.0011 | 0.3      |
| rs2972146  | IRS1                      | 2   | 227100698             | g   | t  | 0.3773           | 0.0323                                                            | 0.0035 | 1.85E-17  | 0.0004                                                              | 0.0009 | 0.67     |
| rs11869286 | STARD3                    | 17  | 37813856              | c   | g  | 0.6755           | 0.0319                                                            | 0.0037 | 2.70E-17  | -0.0052                                                             | 0.0009 | 1.50E-08 |
| rs2293889  | TRPS1                     | 8   | 116599199             | g   | t  | 0.5871           | 0.0312                                                            | 0.0035 | 4.27E-17  | 0.0003                                                              | 0.0009 | 0.72     |
| rs4731702  | KLF14                     | 7   | 130433384             | t   | c  | 0.4604           | 0.0294                                                            | 0.0034 | 4.84E-17  | 0.0017                                                              | 0.0009 | 0.06     |
| rs12748152 | PIGV                      | 1   | 27138393              | c   | t  | 0.9288           | 0.0506                                                            | 0.0062 | 9.74E-16  | -0.0047                                                             | 0.0016 | 0.0044   |
| rs13107325 | SLC39A8                   | 4   | 103188709             | c   | t  | 0.9222           | 0.0708                                                            | 0.0078 | 1.07E-15  | 0.0065                                                              | 0.0017 | 0.00019  |
| rs12328675 | COBL1                     | 2   | 165540800             | c   | t  | 0.1491           | 0.0447                                                            | 0.0052 | 2.13E-15  | -0.0013                                                             | 0.0013 | 0.32     |
| rs7941030  | UBASH3B                   | 11  | 122522375             | c   | t  | 0.3971           | 0.0269                                                            | 0.0035 | 1.12E-14  | 0.0009                                                              | 0.0009 | 0.33     |
| rs7134594  | MMAB                      | 12  | 110000193             | t   | c  | 0.5554           | 0.0354                                                            | 0.0048 | 1.77E-13  | -0.0017                                                             | 0.0009 | 0.059    |
| rs11613352 | R3HDM2                    | 12  | 57792580              | t   | c  | 0.1913           | 0.0281                                                            | 0.0040 | 2.39E-13  | 0.0057                                                              | 0.0010 | 4.70E-08 |
| rs17695224 | FPR3                      | 19  | 52324216              | g   | a  | 0.7612           | 0.0290                                                            | 0.0039 | 2.42E-13  | -0.0004                                                             | 0.0010 | 0.66     |
| rs17145738 | TBL2                      | 7   | 72982874              | t   | c  | 0.1174           | 0.0408                                                            | 0.0053 | 4.95E-13  | -0.0020                                                             | 0.0014 | 0.16     |
| rs4148008  | ABCA8                     | 17  | 66875294              | c   | g  | 0.6913           | 0.0280                                                            | 0.0038 | 1.13E-12  | 0.0008                                                              | 0.0009 | 0.42     |
| rs3822072  | FAM13A                    | 4   | 89741269              | g   | a  | 0.5119           | 0.0251                                                            | 0.0034 | 4.06E-12  | -0.0002                                                             | 0.0009 | 0.82     |
| rs702485   | DAGLB                     | 7   | 6449272               | g   | a  | 0.4499           | 0.0243                                                            | 0.0034 | 6.45E-12  | 0.0016                                                              | 0.0009 | 0.076    |

... to be continued

Supplementary Table I: continued

| SNP        | Nearest Gene <sup>+</sup> | chr | Position <sup>+</sup> | A1* | A2 | EAF <sup>5</sup> | Association results with HDL based on Willer et al. <sup>16</sup> |        |          | Association results with eGFR based on Pattaro et al. <sup>11</sup> |        |          |
|------------|---------------------------|-----|-----------------------|-----|----|------------------|-------------------------------------------------------------------|--------|----------|---------------------------------------------------------------------|--------|----------|
|            |                           |     |                       |     |    |                  | $\beta^{\#}$                                                      | se     | p        | $\beta^{\#\#}$                                                      | se     | p        |
| rs2013208  | SEMA3F                    | 3   | 50129399              | t   | c  | 0.5053           | 0.0254                                                            | 0.0036 | 8.92E-12 | 0.0011                                                              | 0.0009 | 0.23     |
| rs4142995  | SNX13                     | 7   | 17919258              | g   | t  | 0.6161           | 0.0263                                                            | 0.0037 | 9.37E-12 | 0.0008                                                              | 0.0009 | 0.37     |
| rs4129767  | PGS1                      | 17  | 76403984              | a   | g  | 0.5237           | 0.0237                                                            | 0.0034 | 2.10E-11 | -0.0007                                                             | 0.0009 | 0.43     |
| rs998584   | VEGFA                     | 6   | 43757896              | c   | a  | 0.4855           | 0.0260                                                            | 0.0038 | 2.27E-11 | 0.0024                                                              | 0.0010 | 0.019    |
| rs2652834  | LACTB                     | 15  | 63396867              | g   | a  | 0.7652           | 0.0285                                                            | 0.0043 | 3.59E-11 | 0.0044                                                              | 0.0011 | 0.00013  |
| rs13326165 | STAB1                     | 3   | 52532118              | a   | g  | 0.1873           | 0.0289                                                            | 0.0043 | 9.04E-11 | -0.0024                                                             | 0.0011 | 0.034    |
| rs11246602 | OR4C46                    | 11  | 51512090              | c   | t  | 0.1332           | 0.0340                                                            | 0.0052 | 1.68E-10 | 0.0022                                                              | 0.0014 | 0.12     |
| rs970548   | MARCH8                    | 10  | 46013277              | c   | a  | 0.2770           | 0.0258                                                            | 0.0039 | 1.71E-10 | -0.0013                                                             | 0.0010 | 0.19     |
| rs1936800  | RSPO3                     | 6   | 127436064             | c   | t  | 0.5277           | 0.0200                                                            | 0.0034 | 3.06E-10 | 0.0012                                                              | 0.0009 | 0.17     |
| rs6450176  | ARL15                     | 5   | 53298025              | g   | a  | 0.7216           | 0.0254                                                            | 0.0039 | 6.88E-10 | -0.0051                                                             | 0.0010 | 6.20E-07 |
| rs4765127  | ZNF664                    | 12  | 124460167             | t   | g  | 0.3628           | 0.0324                                                            | 0.0050 | 7.79E-10 | 0.0023                                                              | 0.0009 | 0.011    |
| rs731839   | SEPD                      | 19  | 33899065              | a   | g  | 0.6583           | 0.0220                                                            | 0.0037 | 3.44E-09 | 0.0008                                                              | 0.0009 | 0.37     |
| rs2290547  | IT2D2                     | 3   | 47061183              | g   | a  | 0.7889           | 0.0297                                                            | 0.0046 | 3.69E-09 | -0.0007                                                             | 0.0012 | 0.56     |
| rs13076253 | CPNE4                     | 3   | 131751775             | a   | c  | 0.8522           | 0.0283                                                            | 0.0048 | 4.96E-09 | 0.0004                                                              | 0.0013 | 0.78     |
| rs4650994  | C1orf220                  | 1   | 178515312             | g   | a  | 0.5172           | 0.0210                                                            | 0.0034 | 6.70E-09 | 0.0012                                                              | 0.0009 | 0.16     |
| rs1121980  | FTO                       | 16  | 53809247              | g   | a  | 0.5528           | 0.0196                                                            | 0.0034 | 6.79E-09 | -0.0007                                                             | 0.0009 | 0.45     |
| rs4983559  | ZBTB42                    | 14  | 105277209             | g   | a  | 0.3773           | 0.0197                                                            | 0.0036 | 9.57E-09 | -0.0012                                                             | 0.0009 | 0.19     |
| rs4917014  | IKZF1                     | 7   | 50305863              | g   | t  | 0.3404           | 0.0222                                                            | 0.0036 | 1.03E-08 | -0.0013                                                             | 0.0009 | 0.16     |
| rs7134375  | PDE3A                     | 12  | 20473758              | a   | c  | 0.4169           | 0.0207                                                            | 0.0035 | 1.05E-08 | 0.0008                                                              | 0.0009 | 0.39     |
| rs499974   | MOGAT2                    | 11  | 75455021              | c   | a  | 0.8245           | 0.0263                                                            | 0.0044 | 1.12E-08 | 0.0028                                                              | 0.0011 | 0.016    |
| rs6805251  | GSK3B                     | 3   | 119560606             | t   | c  | 0.3813           | 0.0200                                                            | 0.0035 | 1.33E-08 | 0.0004                                                              | 0.0009 | 0.64     |
| rs12145743 | C1orf66                   | 1   | 156700651             | g   | t  | 0.3311           | 0.0203                                                            | 0.0036 | 1.80E-08 | 0.0015                                                              | 0.0009 | 0.11     |
| rs7255436  | ANGPTL4                   | 19  | 8433196               | a   | c  | 0.5435           | 0.0316                                                            | 0.0053 | 1.87E-08 | -0.0003                                                             | 0.0009 | 0.76     |
| rs17173637 | ABP1                      | 7   | 150529449             | t   | c  | 0.9024           | 0.0363                                                            | 0.0057 | 1.90E-08 | -0.0001                                                             | 0.0015 | 0.95     |
| rs605066   | CITED2                    | 6   | 139829666             | t   | c  | 0.5620           | 0.0281                                                            | 0.0049 | 2.79E-08 | 0.0027                                                              | 0.0009 | 0.0027   |
| rs4759375  | SBNO1                     | 12  | 123796238             | t   | c  | 0.0937           | 0.0560                                                            | 0.0102 | 3.01E-08 | -0.0012                                                             | 0.0017 | 0.49     |
| rs12801636 | PCNXL3                    | 11  | 65391317              | a   | g  | 0.2243           | 0.0235                                                            | 0.0042 | 3.15E-08 | 0.0009                                                              | 0.0011 | 0.41     |
| rs12967135 | MC4R                      | 18  | 57849023              | g   | a  | 0.7691           | 0.0262                                                            | 0.0045 | 3.57E-08 | 0.0029                                                              | 0.0010 | 0.0056   |
| rs2606736  | ATG7                      | 3   | 11400249              | c   | t  | 0.3945           | 0.0246                                                            | 0.0043 | 4.80E-08 | 0.0016                                                              | 0.0009 | 0.09     |
| rs10019888 | RBPJ                      | 4   | 26062990              | a   | g  | 0.8364           | 0.0270                                                            | 0.0046 | 4.90E-08 | 0.0007                                                              | 0.0012 | 0.55     |
| rs2602836  | ADH5                      | 4   | 100014805             | a   | g  | 0.4274           | 0.0192                                                            | 0.0034 | 4.96E-08 | -0.0019                                                             | 0.0009 | 0.032    |
| rs2923084  | ADM                       | 11  | 10388782              | a   | g  | 0.8470           | 0.0256                                                            | 0.0045 | 5.00E-08 | 0.0010                                                              | 0.0011 | 0.37     |

<sup>+</sup>Position of the SNP and nearest gene are based on HG19; \*A1:effect allele (HDL-increasing); <sup>#</sup>  $\beta$  estimate: change in s.d. of inverse normally transformed HDL cholesterol values for one HDL-increasing allele; <sup>##</sup>  $\beta$  estimate: change in log-transformed eGFR-values for one HDL-increasing allele;

Significant SNP associations after Bonferroni correction with eGFR are marked in grey

The p-value for SNPs showing a genome-wide significant association with eGFR are written in bold

**Supplementary Table II:** List of all 28 SNPs, which showed potential pleiotropic effects according to the GWAs catalogue (<https://www.ebi.ac.uk/gwas/>)<sup>17</sup>

| <b>SNP</b> | <b>Nearest Gene</b> | <b>Other phenotypes*</b>                       |
|------------|---------------------|------------------------------------------------|
| rs1121980  | <i>FTO</i>          | Triglycerides                                  |
| rs11613352 | <i>R3HDM2</i>       | Triglycerides                                  |
| rs12678919 | <i>LPL</i>          | Triglycerides                                  |
| rs12748152 | <i>PIGV</i>         | Triglycerides                                  |
| rs13107325 | <i>SLC39A8</i>      | BMI, blood pressure, hypertension              |
| rs1532085  | <i>LIPC</i>         | Triglycerides                                  |
| rs17145738 | <i>TBL2</i>         | Triglycerides                                  |
| rs174546   | <i>FADS1</i>        | Triglycerides                                  |
| rs1883025  | <i>ABCA1</i>        | Total cholesterol, metabolic syndrome          |
| rs1936800  | <i>RSPO3</i>        | Triglycerides                                  |
| rs2925979  | <i>GAN</i>          | Adiponectin, waist-hip-ratio                   |
| rs2954029  | <i>TRIB1</i>        | Triglycerides                                  |
| rs2972146  | <i>IRS1</i>         | Triglycerides                                  |
| rs3764261  | <i>CETP</i>         | Triglycerides                                  |
| rs4420638  | <i>APOC1</i>        | LDL cholesterol, triglycerides, CRP, longevity |
| rs4765127  | <i>ZNF664</i>       | Triglycerides                                  |
| rs4846914  | <i>GALNT2</i>       | Triglycerides                                  |
| rs4917014  | <i>IKZF1</i>        | Lupus                                          |
| rs581080   | <i>TTC39B</i>       | Total cholesterol                              |
| rs6065906  | <i>PCIF1</i>        | Triglycerides                                  |
| rs6450176  | <i>ARL15</i>        | Adiponectin                                    |
| rs7241918  | <i>LIPG</i>         | Total cholesterol                              |
| rs731839   | <i>PEPD</i>         | Triglycerides                                  |
| rs7941030  | <i>UBASH3B</i>      | Total cholesterol                              |
| rs964184   | <i>ZNF259</i>       | Triglycerides                                  |
| rs970548   | <i>MARCH8</i>       | Total cholesterol                              |
| rs998584   | <i>VEGFA</i>        | Triglycerides                                  |
| rs9987289  | <i>PPP1R3B</i>      | Total cholesterol, LDL cholesterol             |

\* Genome-wide associated with other phenotypes besides HDL cholesterol according to the GWAs catalogue

**Supplementary Figure I:** Schematic overview on the study design, main findings and interpretation of the results.

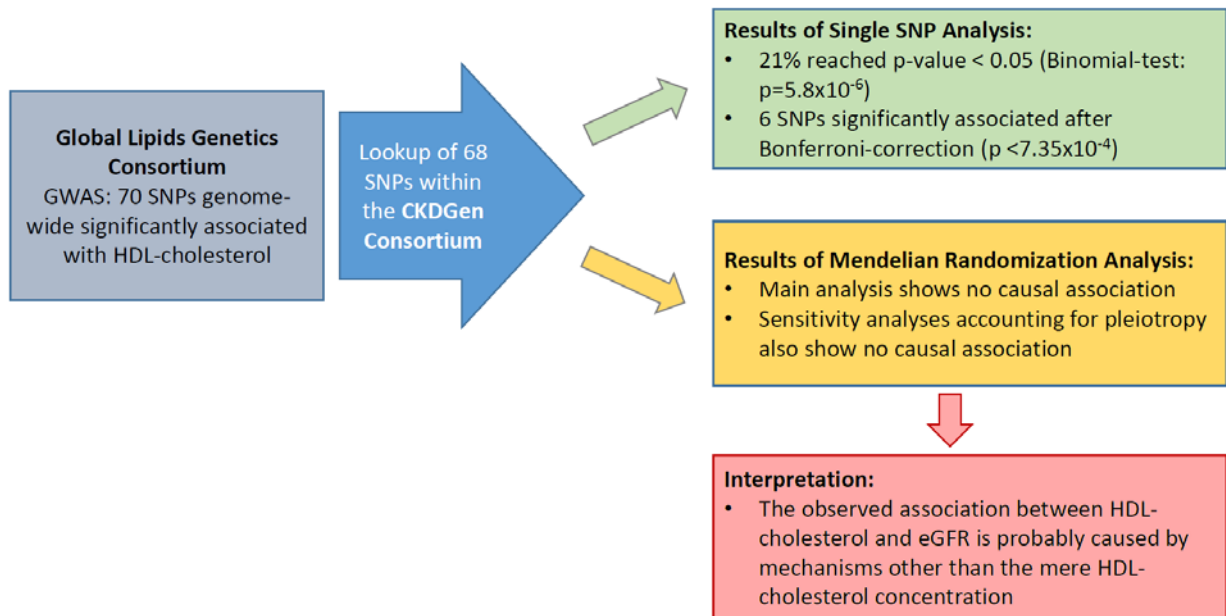

**Supplementary Figure II:** Funnel plot including the two-sample IVW-MR estimate (green) as well as the causal estimate obtained by MR-Egger regression (red) using all 68 SNPs that showed a genome-wide significant association with HDL-c and were available in both datasets used for the Mendelian randomization. The causal estimate is represented by the box and the vertical lines, and the corresponding 95%-CI is shown by the horizontal lines.

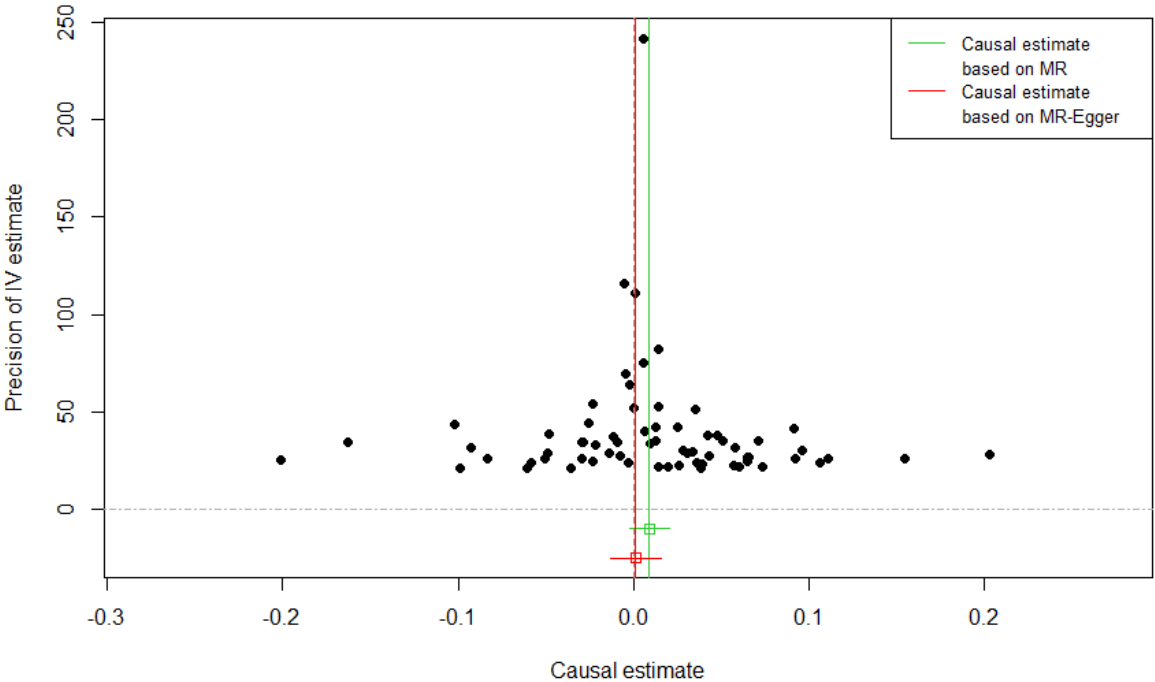



**Supplementary Figure III:** Scatterplots showing the effect estimates of SNP-HDL associations ( $\pm$  95% CI) on the x- and SNP-eGFR associations ( $\pm$  95% CI) on the y-axis. SNPs showing potential pleiotropic effects (according to the GWAS catalog) are marked in blue. The continuous black line represents the two-sample Mendelian Randomization estimate of HDL on eGFR, the dashed lines the corresponding 95% CI. For the Mendelian randomization estimate, potentially pleiotropic SNPs were excluded.

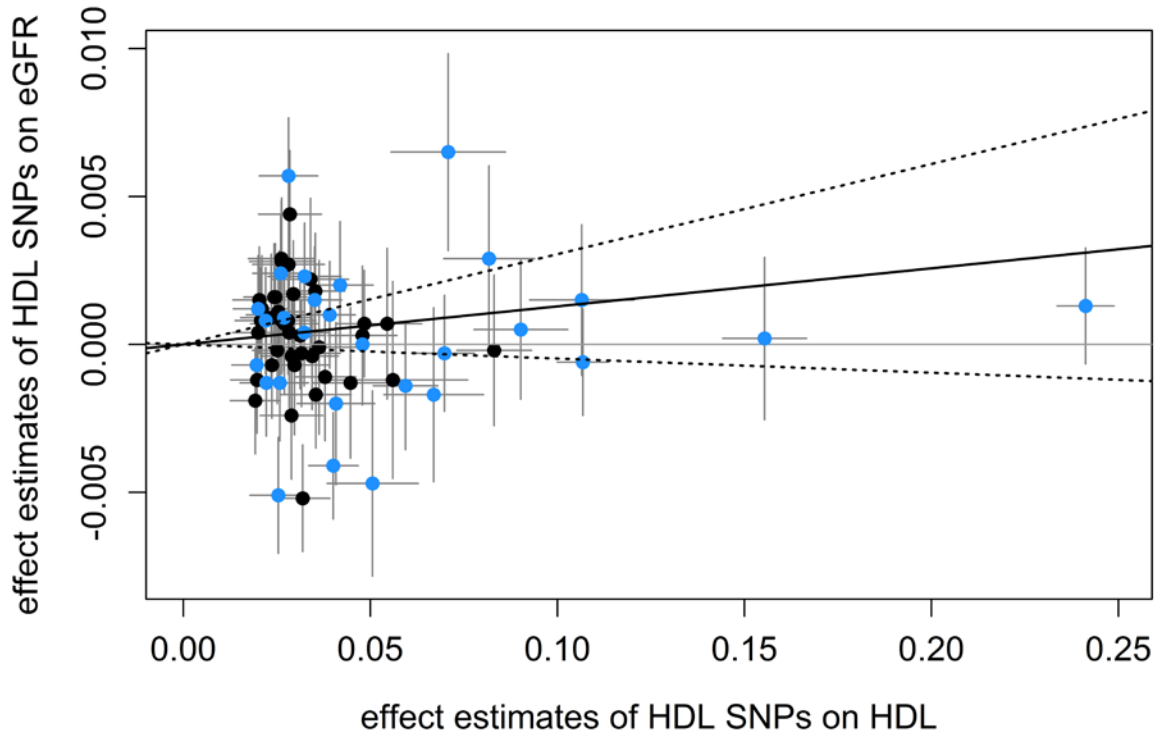

## References

- (1) Soubeyrand S, Martinuk A, Naing T, Lau P, McPherson R. Role of Tribbles Pseudokinase 1 (TRIB1) in human hepatocyte metabolism. *Biochimica et Biophysica Acta* 1862, 223-232. 2016.
- (2) Bauer RC, Yenilmez BO, Rader DJ. Tribbles-1: a novel regulator of hepatic lipid metabolism in humans. *Biochem.Soc.Trans.* 43, 1079-1084. 2015.
- (3) Iwamoto S, Boonvisut S, Makishima S, Ishizuka Y, Watanabe K, Nakayama K. The role of TRIB1 in lipid metabolism; from genetics to pathways. *Biochem.Soc.Trans.* 43, 1063-1068. 2015.
- (4) Neuwirt H, Perco P, Kainz A, Muhlberger I, Leierer J, Braniff SJ, Mayer B, Mayer G, Rudnicki M. A 3-biomarker-panel predicts renal outcome in patients with proteinuric renal diseases. *BMC.Med.Genomics* 7, 75. 2014.
- (5) Ashton-Chess J, Giral M, Mengel M et al. Tribbles-1 as a novel biomarker of chronic antibody-mediated rejection. *Journal of the American Society of Nephrology* 19, 1116-1127. 2008.
- (6) Divers J, Palmer ND, Lu L, Langefeld CD, Rocco MV, Hicks PJ, Murea M, Ma L, Bowden DW, Freedman BI. Gene-gene interactions in APOL1-associated nephropathy. *Nephrology, Dialysis, Transplantation* 29, 587-594. 2014.
- (7) Annema W, Dikkers A, Freark de BJ, Dullaart RP, Sanders JS, Bakker SJ, Tietge UJ. HDL Cholesterol Efflux Predicts Graft Failure in Renal Transplant Recipients. *Journal of the American Society of Nephrology* 27, 595-603. 2016.
- (8) Vaziri ND. HDL abnormalities in nephrotic syndrome and chronic kidney disease. *Nat.Rev.Nephrol.* 12, 37-47. 2016.
- (9) Soffientini U, Caridis AM, Dolan S, Graham A. Intracellular cholesterol transporters and modulation of hepatic lipid metabolism: Implications for diabetic dyslipidaemia and steatosis. *Biochimica et Biophysica Acta* 1842, 1372-1382. 2014.
- (10) Chasman DI, Fuchsberger C, Pattaro C et al. Integration of Genome-Wide Association Studies with Biological Knowledge Identifies Six Novel Genes Related to Kidney Function. *Hum.Mol.Genet.* 21, 5329-5343. 8-9-2012.
- (11) Pattaro C, Teumer A, Gorski M et al. Genetic associations at 53 loci highlight cell types and biological pathways relevant for kidney function. *Nat.Comm.* 7, 10023. 2016.
- (12) Yang Q, Kottgen A, Dehghan A et al. Multiple genetic loci influence serum urate levels and their relationship with gout and cardiovascular disease risk factors. *Circ.Cardiovasc.Genet.* 3, 523-530. 2010.
- (13) Kottgen A, Albrecht E, Teumer A et al. Genome-wide association analyses identify 18 new loci associated with serum urate concentrations. *Nat.Genet.* 45, 145-154. 2013.
- (14) Richards JB, Waterworth D, O'Rahilly S et al. A genome-wide association study reveals variants in ARL15 that influence adiponectin levels. *PLoS.Genet.* 5, e1000768. 2009.
- (15) Wilhelm LP, Tomasetto C, Alpy F. Touche! STARD3 and STARD3NL tether the ER to endosomes. *Biochem.Soc.Trans.* 44, 493-498. 15-4-2016.
- (16) Willer CJ, Schmidt EM, Sengupta S et al. Discovery and refinement of loci associated with lipid levels. *Nat.Genet.* 45, 1274-1283. 2013.
- (17) Welter D, MacArthur J, Morales J, Burdett T, Hall P, Junkins H, Klemm A, Flicek P, Manolio T, Hindorf L, Parkinson H. The NHGRI GWAS Catalog, a curated resource of SNP-trait associations. *Nucleic Acids Res.* 42, D1001-D1006. 2014.
